# Supplementary material for: A Microcavity Array-Based 4D Cell Culture Platform
Source: MDPI journal article supplement (doi:10.3390/bioengineering6020050), 2019-05-31
Supplement: s1 [file s1]

Supplementary Materials to “A microcavity array based 4D cell culture platform”

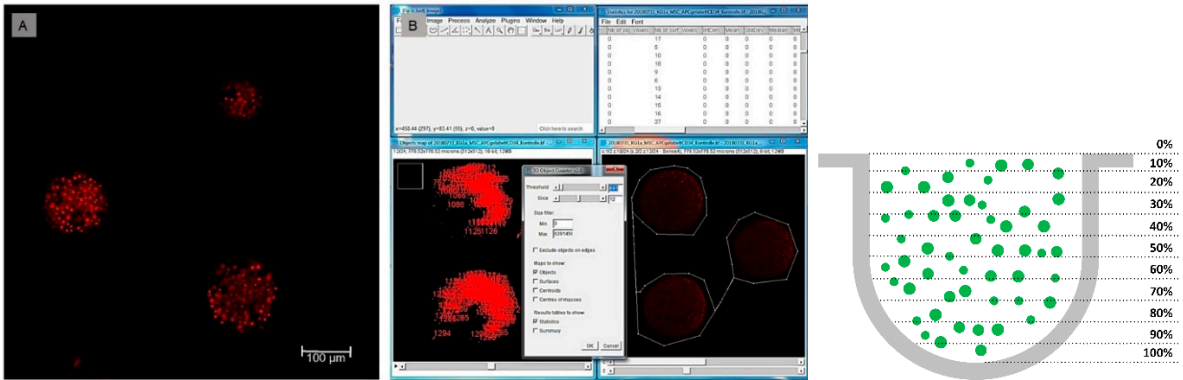

**Figure S1.** Confocal image of the co-culture stained with propidium iodide or Hoechst 33342 for nuclei counting with the help of the 3D object counter tool of the Fiji software. Schematic representation of a microcavity, which is divided into ten equal classes for normalization of the cell count per class.

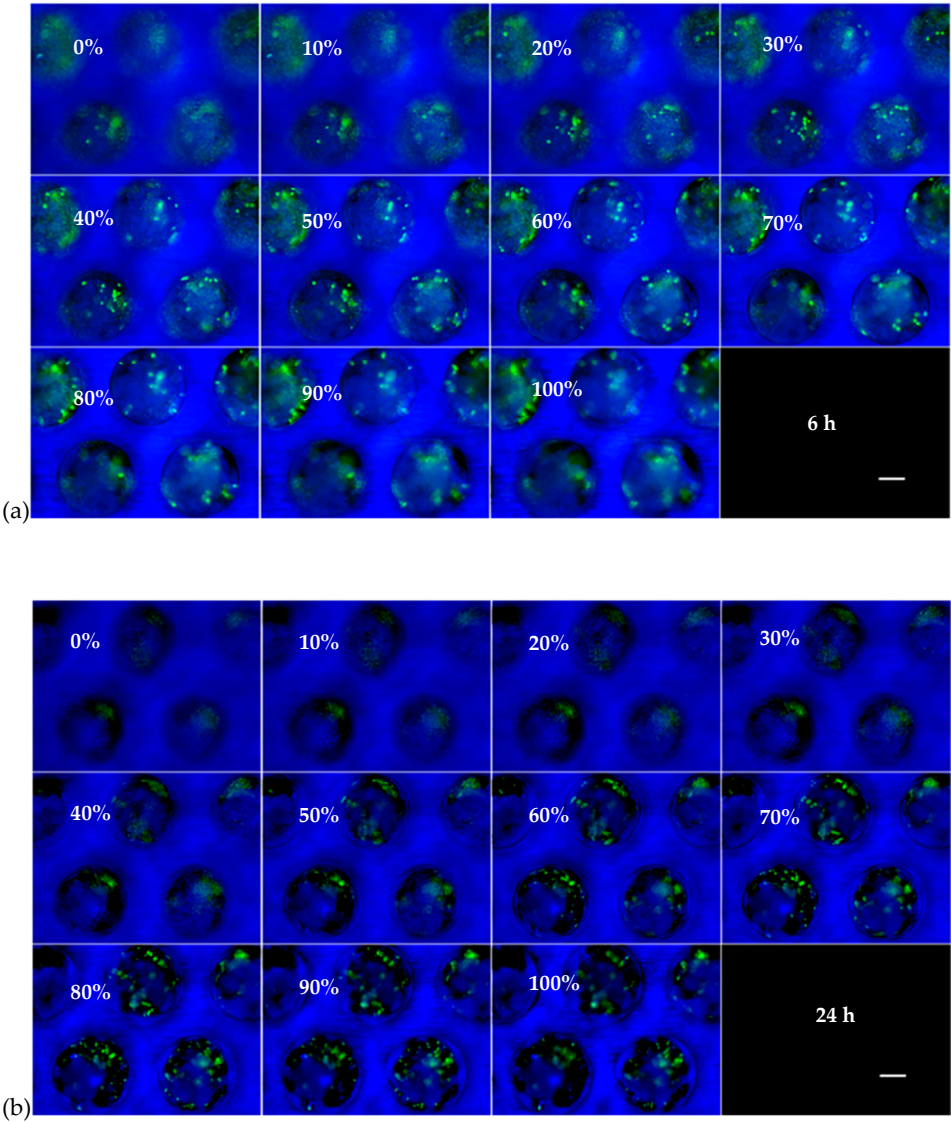

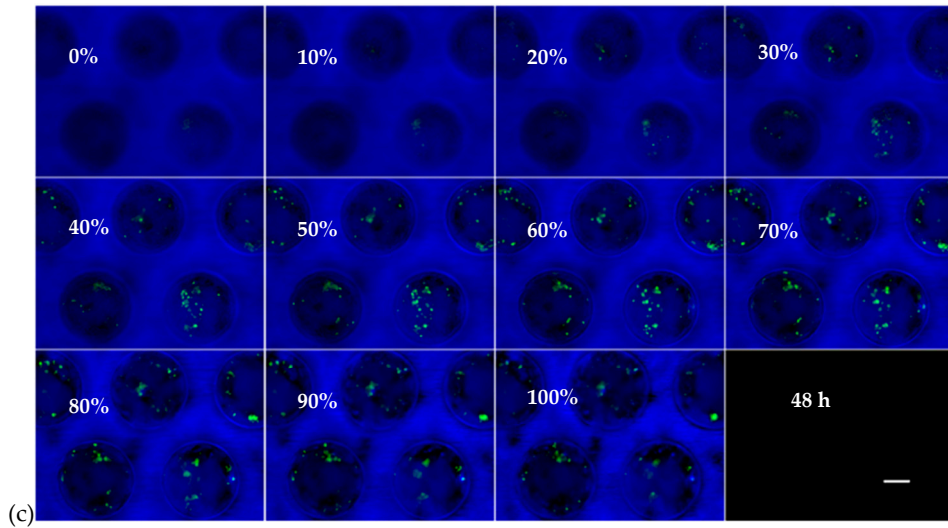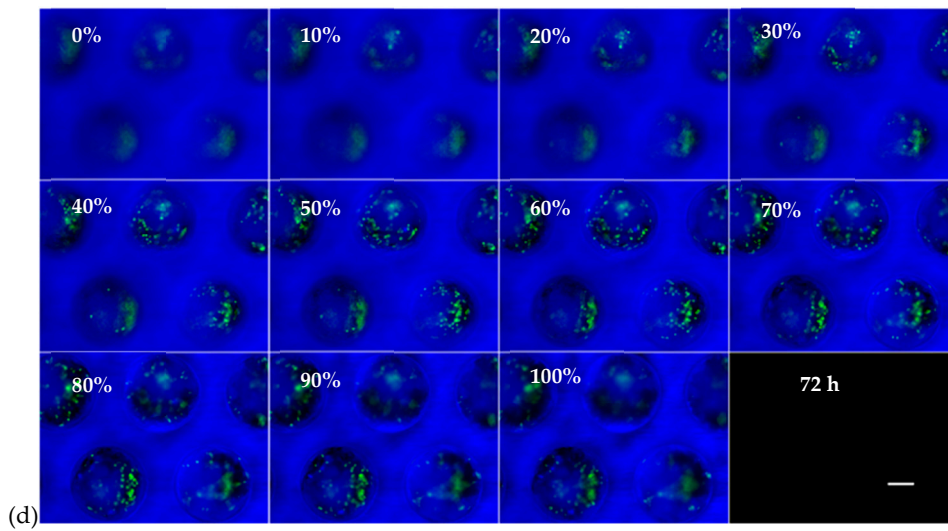

**Figure S2.** 3D-co-culture of KG-1a cells with Hep G2 cells in microcavities after 6 (a), 24 (b), 48 (c), and 72 hours (d). Representative images were taken from 0 % depth (upper left) to 100 % depth (lower right) of the microcavities. Green = KG-1a cells stained with EdU, blue = nuclei stained with Hoechst 33342. Scale bar: 100  $\mu$ m.

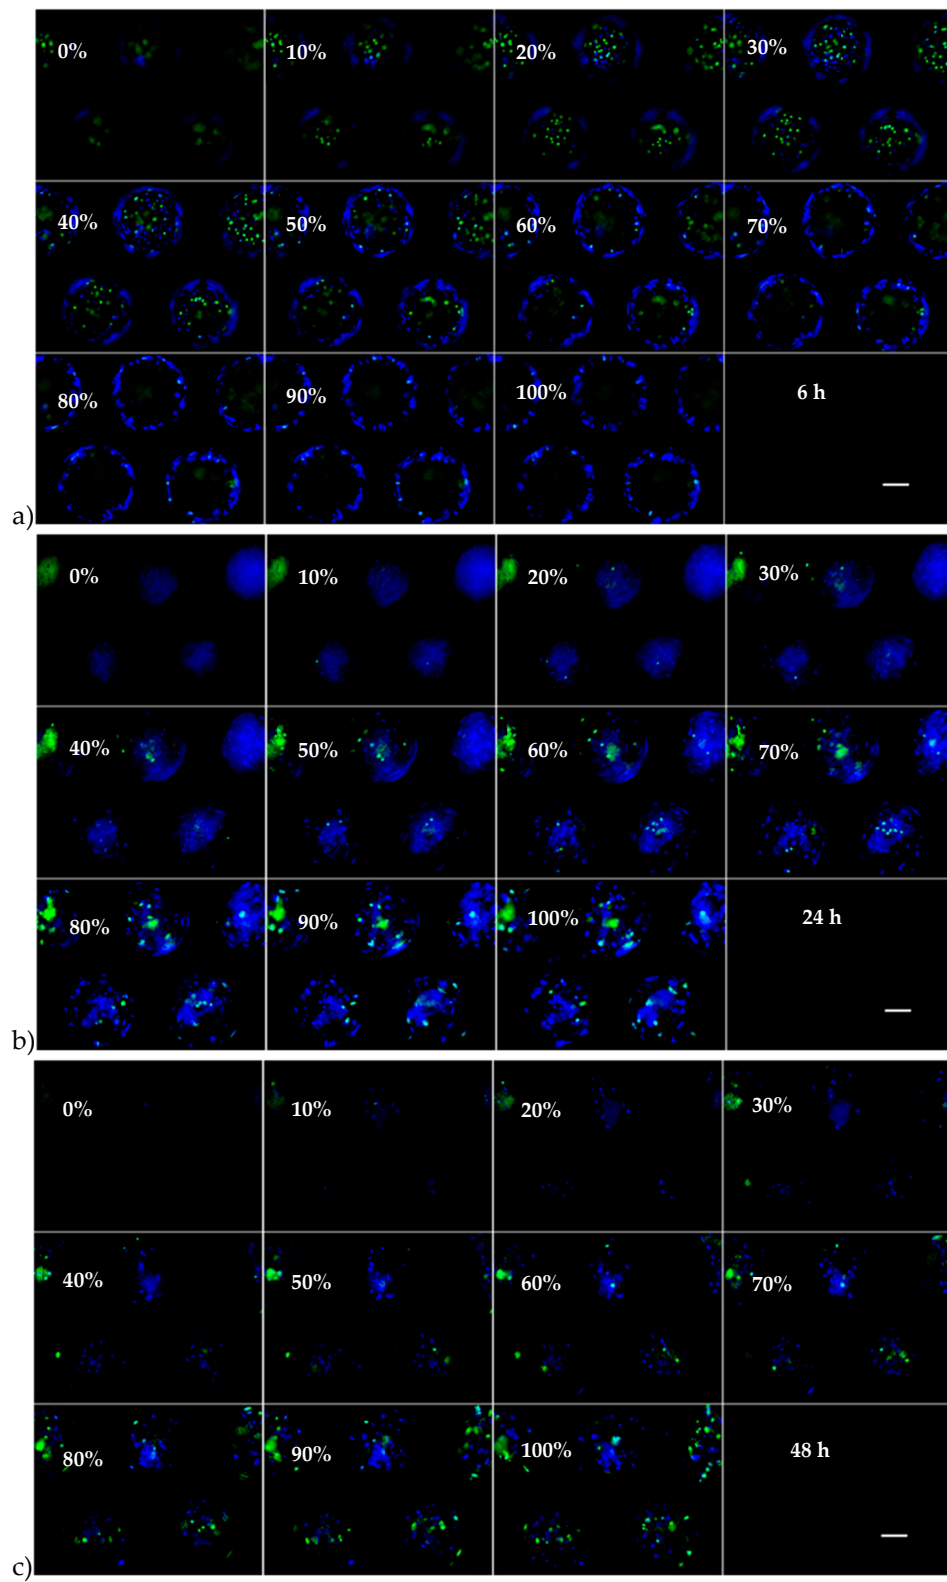

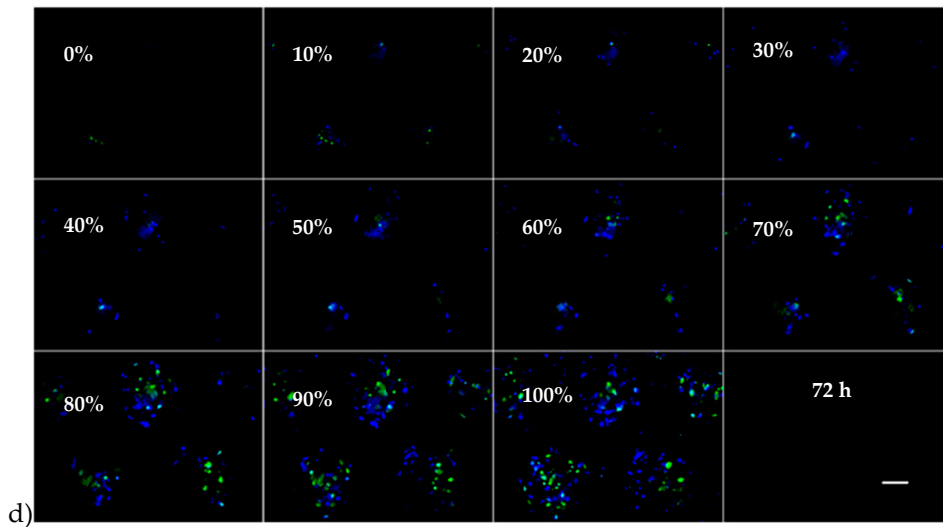

**Figure S3.** 3D-co-culture of KG-1a cells with human bone marrow mesenchymal stromal cells in microcavities after 6 (a), 24 (b), 48 (c), and 72 hours (d). Representative images were taken from 0% depth (upper left) to 100% depth (lower right) of the microcavities. Green = KG-1a cells labelled with EdU, blue = nuclei stained with Hoechst 33342. Scale bar: 100  $\mu$ m.

#### *Labeling of KG-1a with EdU in suspension culture*

Since the labeling efficiency seemed to drop after longer cultivation times we labelled KG-1a cells after various time points of suspension culture (2, 24, 48 and 72 h). As shown in Fig. 12, the labeling efficiency (EdU+ cell fraction of total cell count) of KG-1a cells drops from an initial value of  $43 \% \pm 3 \%$  to  $37 \% \pm 3 \%$  after 24 h,  $25 \% \pm 1 \%$  after 48 h and  $14 \% \pm 1 \%$  after 72 h of culture. Since it is known that EdU may be toxic to cells, we performed an LDH-assay to detect possible cell death associated with the labeling procedure.

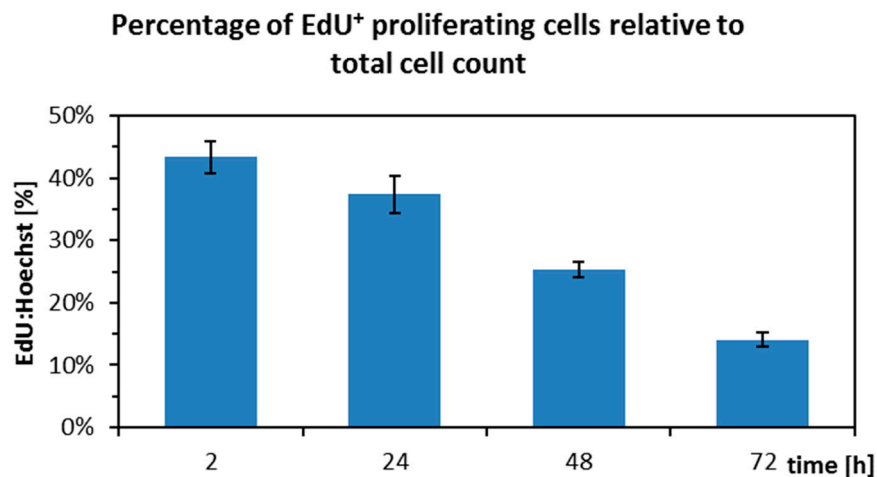

**Figure S4.** Percentage  $\pm$  standard deviation of EdU<sup>+</sup> KG-1a cells relative to total cell count,  $n = 3$ .

Since KG-1a cells are not reported to display a density/contact inhibition phenomenon, we were asking for the reason of the detected decreasing labeling efficiency. Therefore, we performed a LDH-assay to detect a possible toxicity of the EdU and compared the decrease in labeling efficiency with the increase of LDH in the culture supernatant (Fig. S5).

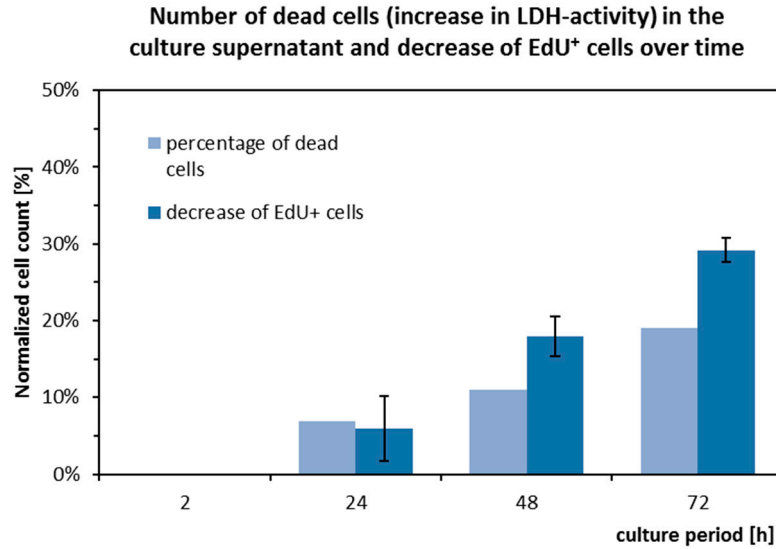

**Figure S5.** Comparison of the increase in LDH-activity in the culture supernatant to the decrease of the number of EdU<sup>+</sup> cells over time.

When the cells were incubated for 2 h with EdU and cultivated for 2, 24, 48, and 72 hours respectively, we detected a decrease in labeling efficiency that was paralleled by an increase in LDH-activity in the culture supernatant. Thus, the EdU may display a cytotoxic effect in our system.

#### EdU-labeling experiments with hHSCs

The established technology of labelling cells with EdU prior to introduction into the microcavity and concomittant microscope detection was then transferred to an hHSC-hMSC co-culture. The appearance of the co-culture after days 1, 3, 7, and 14 is depicted in supplementary fig. S6. As before, EdU-labelling was performed for 2 hours and afterwards mixed in suspension with hMSCs. The microscope detection revealed that the HSCs were only minimally labeled (Fig. S6), indicating their slow cell cycle.

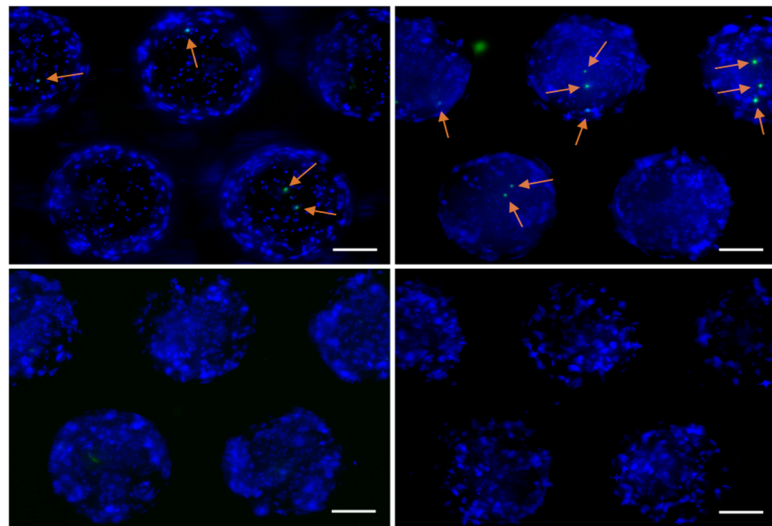

**Figure S6.** hHSCs (red arrows) labeled with EdU for 2 h. Blue = nuclei stained with Hoechst 33342. Scale bar: 100  $\mu$ m.

We therefore extended the labelling duration to 20 hours and repeated the experiment. As can be seen in Fig. S7, despite the ten times longer labelling period only a very limited fraction of the



hHSCs was labelled, which meant that a longer observation and quantitative analysis of the migration and proliferation behaviour was not possible. For the slow cycling population of hHSCs it is clear that a different labelling strategy has to be applied.

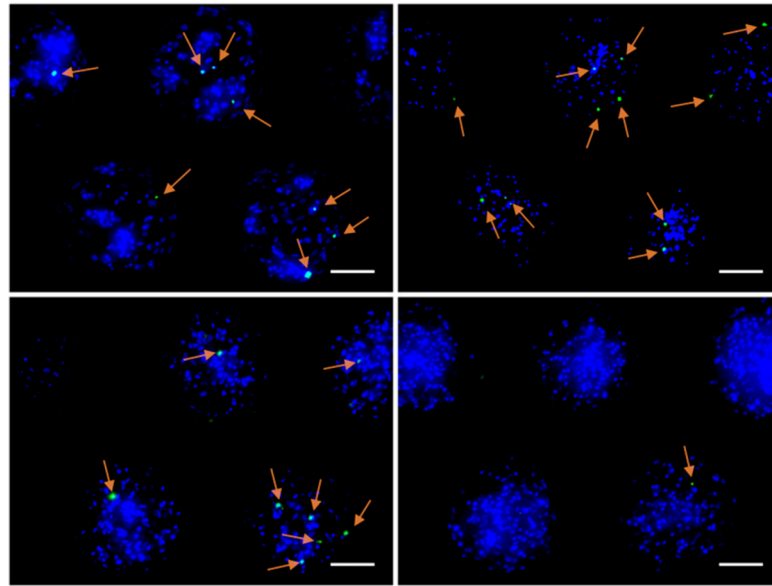

**Figure S7.** hHSCs (red arrows) labelled with EdU for 20 h. Blue = nuclei stained with Hoechst 33342. Scale bar: 100  $\mu$ m.

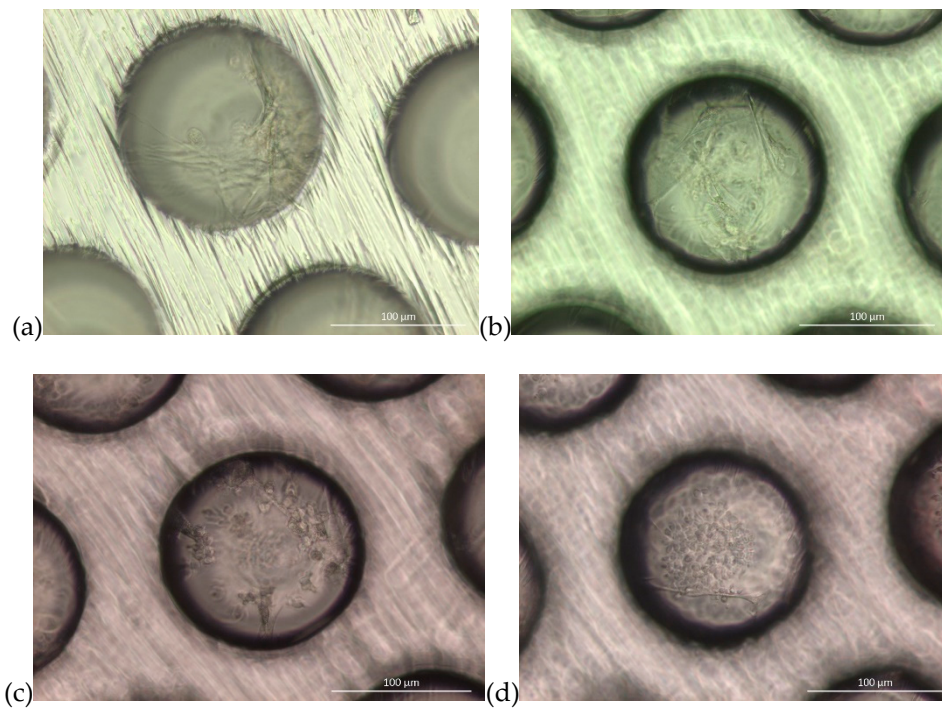

**Figure S8.** HSC/MSC co-culture appearance after day 1 (a), 3 (b), 7 (c), and 14 (d). Scale bar: 100  $\mu$ m.
